# Supplementary material for: The Preparation, Determination of a Flexible Complex Liposome Co-Loaded with Cabazitaxel and β-Elemene, and Animal Pharmacodynamics on Paclitaxel-Resistant Lung Adenocarcinoma
Source: MDPI journal article supplement (doi:10.3390/molecules24091697), 2019-04-30
Supplement: s1 [file s1]

## Supporting Information

# The Preparation, Determination of a Flexible Complex Liposome Co-Loaded with Cabazitaxel and $\beta$ -Elemene, and Animal Pharmacodynamics on Paclitaxel-Resistant Lung Adenocarcinoma

Yi-Ying Zeng<sup>1,2,3,4</sup>, Yi-Jun Zeng<sup>2,3,4</sup>, Na-Na Zhang<sup>2,3,4</sup>, Chen-Xi Li<sup>2,3,4</sup>, Tian Xie<sup>1,2,3,4,\*</sup> and Zhao-Wu Zeng<sup>2,3,4,\*</sup>

<sup>1</sup> Institute of Chinese Materia Medica, Shanghai University of Traditional Chinese Medicine, 1200 Cailun Road, Shanghai 201203, China; zengyiyi2008@163.com

<sup>2</sup> Holistic Integrative Pharmacy Institutes, Hangzhou Normal University, 1378 Wenyi Road, Hangzhou 311121, China; zy0508j@163.com (Y.-J.Z.); nanazhang2019@126.com (N.-N.Z.); chenxichenhaochen@163.com (C.-X.L.)

<sup>3</sup> Key Laboratory of Elemene Class Anti-cancer Chinese Medicine of Zhejiang Province, Hangzhou 311121, China

<sup>4</sup> Engineering Laboratory of Development and Application of Traditional Chinese Medicine from Zhejiang Province, Hangzhou 311121, China

\* Correspondence: xbs@hznu.edu.cn (T.X.); artgreenking@126.com (Z.-W.Z.); Tel.: +86 571 28860237 (T.X.); +86 571 28865458 (Z.-W.Z.)

## Contents

Figure S1–S3, the particle size and distribution of the complex liposome.

Figure S4–S6, the particle size and distribution of the  $\beta$ -elemene liposome.

Figure S7–S9, the particle size and distribution of the cabazitaxel liposome.

Figure S10, the release rate and fitting curve of cabazitaxel in the complex liposome

Figure S11, the release rate and fitting curve of  $\beta$ -elemene in the complex liposome

Figure S12, the release rate and fitting curve of cabazitaxel in the cabazitaxel liposome

Figure S13, the release rate and fitting curve of  $\beta$ -elemene in the  $\beta$ -elemene liposome

# Particle Size Analysis

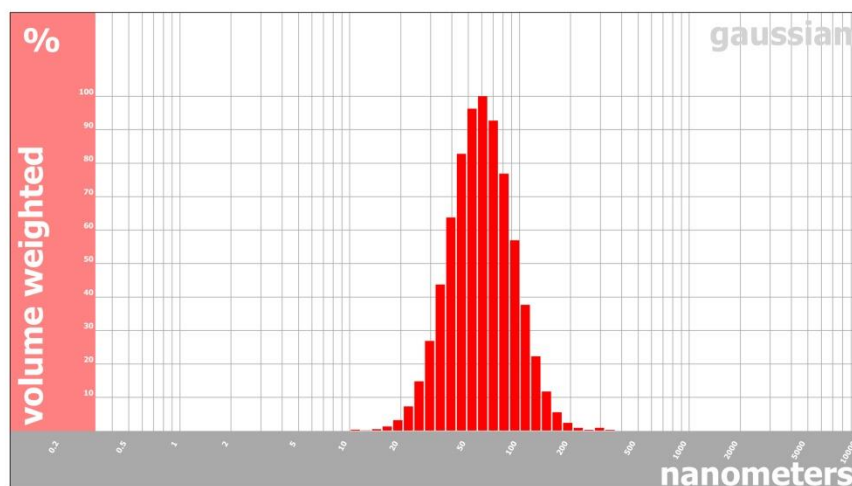

Particle Sizing System NICOMP

Serial Number

1808303

**cabazitaxel-beta-elemene liposome - Lot: 2018111701**

Custom Recipe

Sample Date 2019/4/18

Refractive Index 1.333

Viscosity 0.933 cP

Particle Type Solid

Cell Type Square

Measurement Date 2019/4/18 13:14 UTC+08:00

Channel Width 13  $\mu$ sec (auto)

Temperature 23  $^{\circ}$ C

Intensity Set Point 300 KHz

First Channel Used 2

## Analysis Results - Gaussian Distribution

|                           | Intensity        | Volume        | Number        |                         |         |
|---------------------------|------------------|---------------|---------------|-------------------------|---------|
| <b>Mean Diameter</b>      | <b>108.08</b>    | <b>65.04</b>  | <b>36.41</b>  | <b>Run Time</b>         | 0:05:03 |
| St.Dev.                   | 46.26            | 27.84         | 15.58         | <b>Chi<sup>2</sup></b>  | 15.755  |
| CV %                      | 42.80%           | 42.80%        | 42.80%        | <b>Baseline Adj.</b>    | 0.000   |
| PI                        | 0.18             | 0.18          | 0.18          | <b>Decay</b>            | 2.487   |
|                           |                  |               |               | <b>Fit Error</b>        | 5.991   |
|                           |                  |               |               | <b>Residual</b>         | 5.439   |
| <b>Cumulative Results</b> | <b>Intensity</b> | <b>Volume</b> | <b>Number</b> | <b>Minimun Diameter</b> | 10 nm   |
| 25% of distribution <     | 73.79            | 44.42         | 25.14         | <b>Plot Size</b>        | 45      |
| 50% of distribution <     | 98.53            | 59.31         | 33.40         | <b>Smoothing</b>        | 3       |
| 75% of distribution <     | 131.57           | 79.18         | 44.49         | <b>Plot Range</b>       | 100     |
| 80% of distribution <     | 141.34           | 85.06         | 47.78         |                         |         |
| 90% of distribution <     | 170.66           | 102.71        | 57.66         |                         |         |
| 99% of distribution <     | 266.96           | 160.67        | 90.10         |                         |         |

### Printed:

2019/4/18 13:15 UTC+08:00 - zyy

### Measured:

2019/4/18 13:14 UTC+08:00 - zyy

### Approved:

2019/4/18 13:14 UTC+08:00 - zzw

**Figure S1.** The particle size and distribution of the complex liposome (1)

# Particle Size Analysis

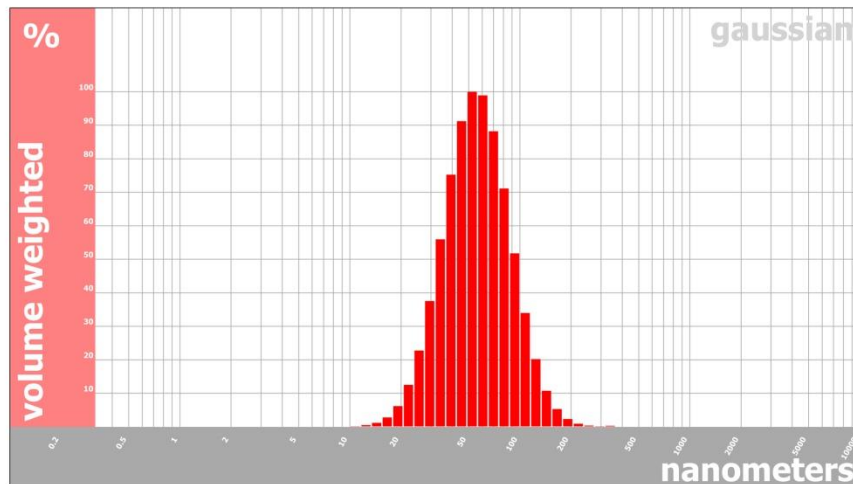

Particle Sizing System NICOMP

Serial Number

1808303

**cabazitaxel-beta-elemene liposome - Lot: 2018111701**

Custom Recipe

Sample Date 2019/4/18

Refractive Index 1.333

Viscosity 0.933 cP

Particle Type Solid

Cell Type Square

Measurement Date 2019/4/18 13:23 UTC+08:00

Channel Width 12  $\mu$ sec (auto)

Temperature 23  $^{\circ}$ C

Intensity Set Point 300 KHz

First Channel Used 2

## Analysis Results - Gaussian Distribution

|                           | Intensity        | Volume        | Number        |                         |         |
|---------------------------|------------------|---------------|---------------|-------------------------|---------|
| <b>Mean Diameter</b>      | <b>107.62</b>    | <b>61.35</b>  | <b>32.55</b>  | <b>Run Time</b>         | 0:05:03 |
| St.Dev.                   | 48.32            | 27.55         | 14.61         | <b>Chi<sup>2</sup></b>  | 23.420  |
| CV %                      | 44.90%           | 44.90%        | 44.90%        | <b>Baseline Adj.</b>    | 0.000   |
| PI                        | 0.20             | 0.20          | 0.20          | <b>Decay</b>            | 2.307   |
|                           |                  |               |               | <b>Fit Error</b>        | 7.519   |
|                           |                  |               |               | <b>Residual</b>         | 0.000   |
| <b>Cumulative Results</b> | <b>Intensity</b> | <b>Volume</b> | <b>Number</b> | <b>Minimun Diameter</b> | 10 nm   |
| 25% of distribution <     | 71.77            | 40.94         | 22.34         | <b>Plot Size</b>        | 45      |
| 50% of distribution <     | 97.21            | 55.43         | 29.86         | <b>Smoothing</b>        | 3       |
| 75% of distribution <     | 131.66           | 75.07         | 40.21         | <b>Plot Range</b>       | 100     |
| 80% of distribution <     | 141.93           | 80.92         | 43.31         |                         |         |
| 90% of distribution <     | 172.98           | 98.62         | 52.69         |                         |         |
| 99% of distribution <     | 276.60           | 157.70        | 84.05         |                         |         |

### Printed:

2019/4/18 13:24 UTC+08:00 - zyy

### Measured:

2019/4/18 13:23 UTC+08:00 - zyy

### Approved:

2019/4/18 13:23 UTC+08:00 - zzw

**Figure S2.** The particle size and distribution of the complex liposome (2)

# Particle Size Analysis

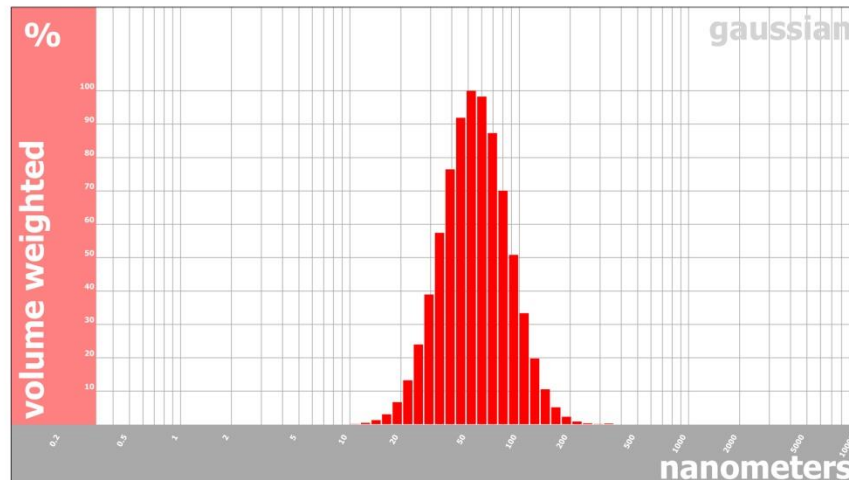

Particle Sizing System NICOMP

Serial Number

1808303

**cabazitaxel-beta-elemene liposome - Lot: 2018111701**

Custom Recipe

Sample Date 2019/4/18

Refractive Index 1.333

Viscosity 0.933 cP

Particle Type Solid

Cell Type Square

Measurement Date 2019/4/18 13:31 UTC+08:00

Channel Width 12  $\mu$ sec (auto)

Temperature 23  $^{\circ}$ C

Intensity Set Point 300 KHz

First Channel Used 2

## Analysis Results - Gaussian Distribution

|                           | Intensity        | Volume        | Number        |                         |         |
|---------------------------|------------------|---------------|---------------|-------------------------|---------|
| <b>Mean Diameter</b>      | <b>106.93</b>    | <b>60.48</b>  | <b>31.89</b>  | <b>Run Time</b>         | 0:05:02 |
| St.Dev.                   | 48.33            | 27.34         | 14.41         | <b>Chi<sup>2</sup></b>  | 15.661  |
| CV %                      | 45.20%           | 45.20%        | 45.20%        | <b>Baseline Adj.</b>    | 0.000   |
| PI                        | 0.20             | 0.20          | 0.20          | <b>Decay</b>            | 2.323   |
|                           |                  |               |               | <b>Fit Error</b>        | 5.652   |
|                           |                  |               |               | <b>Residual</b>         | 18.254  |
| <b>Cumulative Results</b> | <b>Intensity</b> | <b>Volume</b> | <b>Number</b> | <b>Minimum Diameter</b> | 10 nm   |
| 25% of distribution <     | 71.10            | 40.24         | 21.89         | <b>Plot Size</b>        | 45      |
| 50% of distribution <     | 96.47            | 54.58         | 29.27         | <b>Smoothing</b>        | 3       |
| 75% of distribution <     | 130.89           | 74.05         | 39.47         | <b>Plot Range</b>       | 100     |
| 80% of distribution <     | 141.17           | 79.87         | 42.52         |                         |         |
| 90% of distribution <     | 172.26           | 97.45         | 51.78         |                         |         |
| 99% of distribution <     | 276.23           | 156.26        | 82.81         |                         |         |

### Printed:

2019/4/18 13:32 UTC+08:00 - zyy

### Measured:

2019/4/18 13:31 UTC+08:00 - zyy

### Approved:

2019/4/18 13:31 UTC+08:00 - zzw

**Figure S3.** The particle size and distribution of the complex liposome (3)

# Particle Size Analysis

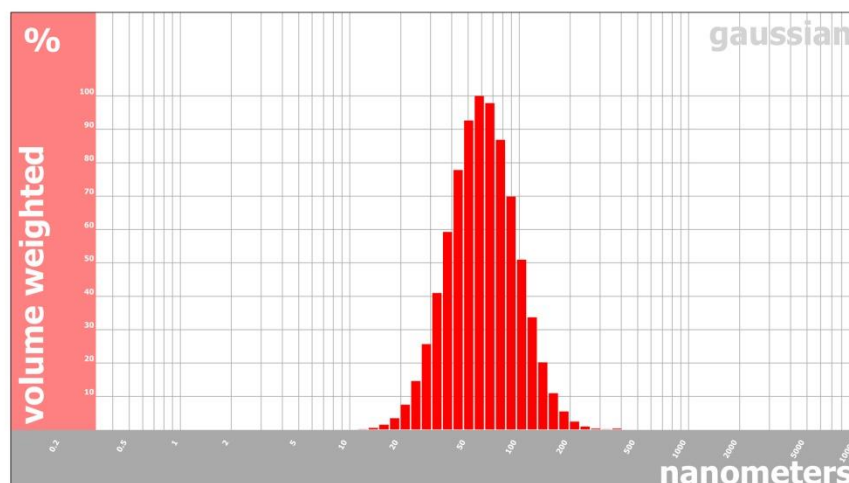

Particle Sizing System NICOMP

Serial Number

1808303

**beta-elemene liposome - Lot: 2018110801**

Custom Recipe

Sample Date 2019/4/18

Refractive Index 1.333

Viscosity 0.933 cP

Particle Type Solid

Cell Type Square

Measurement Date 2019/4/18 12:31 UTC+08:00

Channel Width 13  $\mu$ sec (auto)

Temperature 23  $^{\circ}$ C

Intensity Set Point 300 KHz

First Channel Used 2

## Analysis Results - Gaussian Distribution

|                      | Intensity     | Volume       | Number       |
|----------------------|---------------|--------------|--------------|
| <b>Mean Diameter</b> | <b>119.31</b> | <b>67.22</b> | <b>34.40</b> |
| St.Dev.              | 54.76         | 30.85        | 15.79        |
| CV %                 | 45.90%        | 45.90%       | 45.90%       |
| PI                   | 0.21          | 0.21         | 0.21         |

| Cumulative Results    | Intensity | Volume | Number |
|-----------------------|-----------|--------|--------|
| 25% of distribution < | 78.69     | 44.37  | 23.64  |
| 50% of distribution < | 107.29    | 60.47  | 31.64  |
| 75% of distribution < | 146.27    | 82.43  | 42.78  |
| 80% of distribution < | 157.95    | 89.01  | 46.14  |
| 90% of distribution < | 193.33    | 108.94 | 56.33  |
| 99% of distribution < | 312.34    | 175.99 | 90.67  |

Run Time 0:05:02

Chi<sup>2</sup> 84.693

Baseline Adj. 0.000

Decay 2.253

Fit Error 17.458

Residual 11.261

Minimun Diameter 10 nm

Plot Size 45

Smoothing 3

Plot Range 100

**Printed:**

2019/4/18 12:37 UTC+08:00 - zyy

**Measured:**

2019/4/18 12:31 UTC+08:00 - zyy

**Approved:**

2019/4/18 12:31 UTC+08:00 - zzw

**Figure S4.** The particle size and distribution of the  $\beta$ -elemene liposome (1)

# Particle Size Analysis

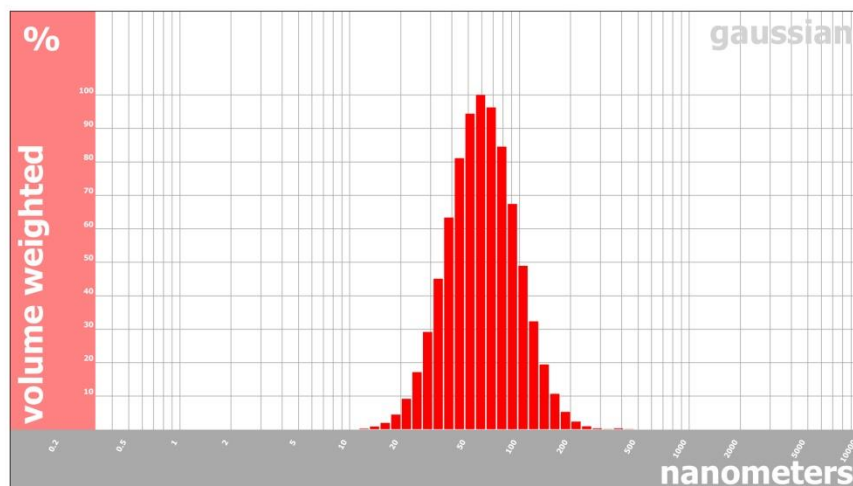

Particle Sizing System NICOMP

Serial Number

1808303

**beta-elemene liposome - Lot: 2018110801**

Custom Recipe

Sample Date 2019/4/18

Refractive Index 1.333

Viscosity 0.933 cP

Particle Type Solid

Cell Type Square

Measurement Date 2019/4/18 12:46 UTC+08:00

Channel Width 13  $\mu$ sec (auto)

Temperature 23  $^{\circ}$ C

Intensity Set Point 300 KHz

First Channel Used 2

## Analysis Results - Gaussian Distribution

|                      | Intensity     | Volume       | Number       |
|----------------------|---------------|--------------|--------------|
| <b>Mean Diameter</b> | <b>121.23</b> | <b>66.91</b> | <b>33.46</b> |
| St.Dev.              | 56.73         | 31.32        | 15.66        |
| CV %                 | 46.80%        | 46.80%       | 46.80%       |
| PI                   | 0.22          | 0.22         | 0.22         |

| Cumulative Results    | Intensity | Volume | Number |
|-----------------------|-----------|--------|--------|
| 25% of distribution < | 79.17     | 43.75  | 23.09  |
| 50% of distribution < | 108.58    | 59.97  | 30.89  |
| 75% of distribution < | 148.90    | 82.22  | 41.90  |
| 80% of distribution < | 161.01    | 88.91  | 45.23  |
| 90% of distribution < | 197.83    | 109.23 | 55.38  |
| 99% of distribution < | 322.50    | 178.05 | 89.84  |

Run Time 0:05:02

Chi<sup>2</sup> 90.537

Baseline Adj. 0.000

Decay 2.218

Fit Error 15.020

Residual 13.089

Minimum Diameter 10 nm

Plot Size 45

Smoothing 3

Plot Range 100

### Printed:

2019/4/18 12:48 UTC+08:00 - zyy

### Measured:

2019/4/18 12:46 UTC+08:00 - zyy

### Approved:

2019/4/18 12:46 UTC+08:00 - zzw

**Figure S5.** The particle size and distribution of the  $\beta$ -elemene liposome (2)

# Particle Size Analysis

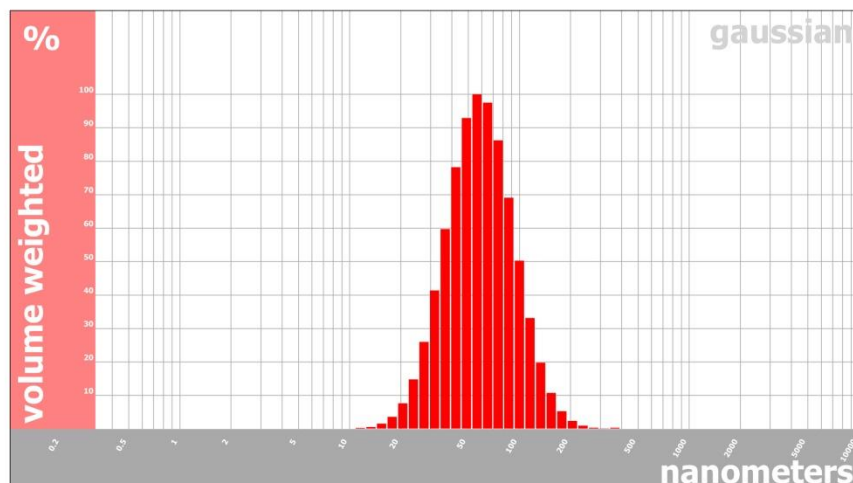

Particle Sizing System NICOMP

Serial Number

1808303

**beta-elemene liposome - Lot: 2018110801**

Custom Recipe

Sample Date 2019/4/18

Refractive Index 1.333

Viscosity 0.933 cP

Particle Type Solid

Cell Type Square

Measurement Date 2019/4/18 13:05 UTC+08:00

Channel Width 13  $\mu$ sec (auto)

Temperature 23  $^{\circ}$ C

Intensity Set Point 300 KHz

First Channel Used 2

## Analysis Results - Gaussian Distribution

|                      | Intensity     | Volume       | Number       |
|----------------------|---------------|--------------|--------------|
| <b>Mean Diameter</b> | <b>115.45</b> | <b>64.75</b> | <b>33.28</b> |
| St.Dev.              | 52.99         | 29.72        | 15.28        |
| CV %                 | 45.90%        | 45.90%       | 45.90%       |
| PI                   | 0.21          | 0.21         | 0.21         |

| Cumulative Results    | Intensity | Volume | Number |
|-----------------------|-----------|--------|--------|
| 25% of distribution < | 76.16     | 42.75  | 22.88  |
| 50% of distribution < | 103.83    | 58.25  | 30.61  |
| 75% of distribution < | 141.54    | 79.40  | 41.39  |
| 80% of distribution < | 152.84    | 85.74  | 44.64  |
| 90% of distribution < | 187.06    | 104.93 | 54.49  |
| 99% of distribution < | 302.15    | 169.48 | 87.71  |

Run Time 0:05:02

Chi<sup>2</sup> 77.978

Baseline Adj. 0.000

Decay 2.330

Fit Error 17.560

Residual 10.814

Minimun Diameter 10 nm

Plot Size 45

Smoothing 3

Plot Range 100

### Printed:

2019/4/18 13:06 UTC+08:00 - zyy

### Measured:

2019/4/18 13:05 UTC+08:00 - zyy

### Approved:

2019/4/18 13:05 UTC+08:00 - zzw

**Figure S6.** The particle size and distribution of the  $\beta$ -elemene liposome (3)

# Particle Size Analysis

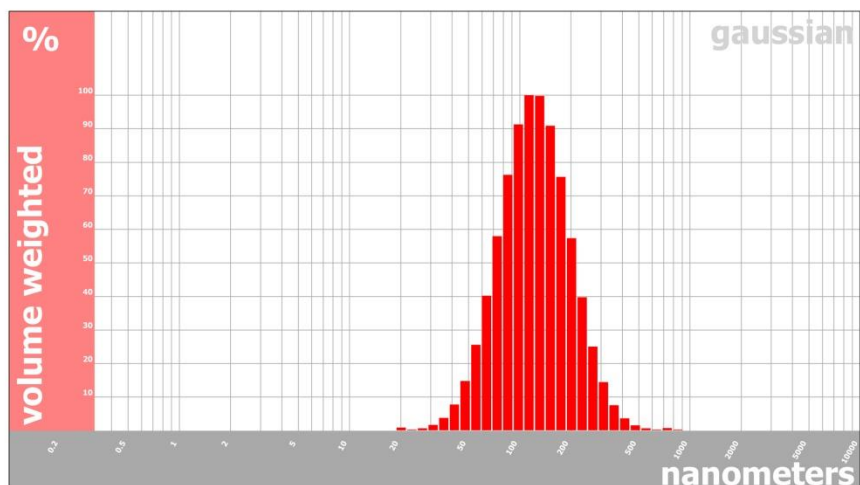

Particle Sizing System NICOMP

Serial Number

1808303

**cabazitaxel liposome - Lot: 2018111401**

Custom Recipe

Sample Date 2019/4/18

Refractive Index 1.333

Viscosity 0.933 cP

Particle Type Solid

Cell Type Square

Measurement Date 2019/4/18 14:11 UTC+08:00

Channel Width 24  $\mu$ sec (auto)

Temperature 23  $^{\circ}$ C

Intensity Set Point 300 KHz

First Channel Used 2

## Analysis Results - Gaussian Distribution

|                      | Intensity     | Volume        | Number       |
|----------------------|---------------|---------------|--------------|
| <b>Mean Diameter</b> | <b>201.29</b> | <b>135.87</b> | <b>55.06</b> |
| St.Dev.              | 95.61         | 64.54         | 26.15        |
| CV %                 | 47.50%        | 47.50%        | 47.50%       |
| PI                   | 0.23          | 0.23          | 0.23         |

| Cumulative Results    | Intensity | Volume | Number |
|-----------------------|-----------|--------|--------|
| 25% of distribution < | 130.38    | 88.03  | 37.94  |
| 50% of distribution < | 179.67    | 121.30 | 50.86  |
| 75% of distribution < | 247.59    | 167.14 | 69.22  |
| 80% of distribution < | 268.07    | 180.96 | 74.80  |
| 90% of distribution < | 330.42    | 223.04 | 91.83  |
| 99% of distribution < | 542.70    | 366.33 | 150.02 |

|                  |         |
|------------------|---------|
| Run Time         | 0:05:03 |
| Chi <sup>2</sup> | 37.911  |
| Baseline Adj.    | 0.000   |
| Decay            | 2.465   |
| Fit Error        | 2.593   |
| Residual         | 9.659   |

|                  |       |
|------------------|-------|
| Minimun Diameter | 10 nm |
| Plot Size        | 45    |
| Smoothing        | 3     |
| Plot Range       | 100   |

### Printed:

2019/4/18 14:13 UTC+08:00 - zyy

### Measured:

2019/4/18 14:11 UTC+08:00 - zyy

### Approved:

2019/4/18 14:11 UTC+08:00 - zzw

**Figure S7.** The particle size and distribution of the cabazitaxel liposome (1)



# Particle Size Analysis

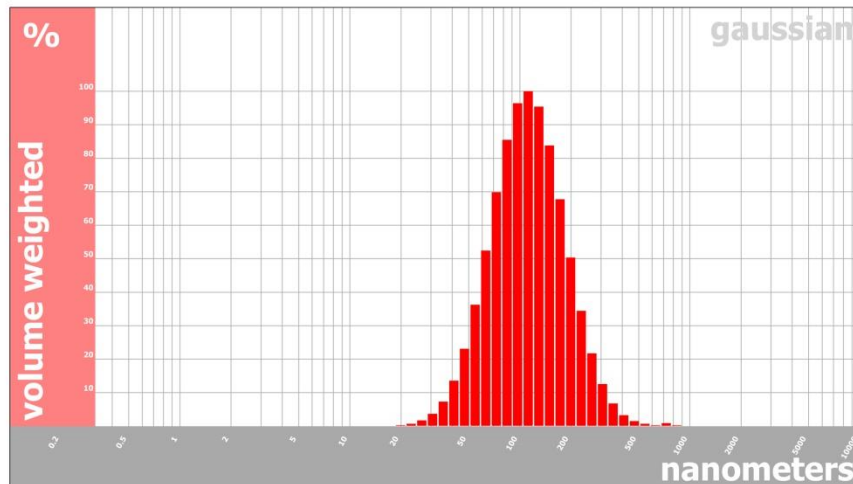

Particle Sizing System NICOMP

Serial Number

1808303

## cabazitaxel liposome - Lot: 2018111401

### Custom Recipe

Sample Date 2019/4/18

Refractive Index 1.333

Viscosity 0.933 cP

Particle Type Solid

Cell Type Square

Measurement Date 2019/4/18 14:21 UTC+08:00

Channel Width 23  $\mu$ sec (auto)

Temperature 23  $^{\circ}$ C

Intensity Set Point 300 KHz

First Channel Used 2

### Analysis Results - Gaussian Distribution

|                           | Intensity | Volume | Number |                  |         |
|---------------------------|-----------|--------|--------|------------------|---------|
| Mean Diameter             | 198.88    | 125.56 | 48.24  | Run Time         | 0:05:04 |
| St.Dev.                   | 99.24     | 62.66  | 24.07  | Chi <sup>2</sup> | 26.843  |
| CV %                      | 49.90%    | 49.90% | 49.90% | Baseline Adj.    | 0.000   |
| PI                        | 0.25      | 0.25   | 0.25   | Decay            | 2.390   |
|                           |           |        |        | Fit Error        | 3.199   |
|                           |           |        |        | Residual         | 19.693  |
| <b>Cumulative Results</b> |           |        |        | Minimun Diameter | 10 nm   |
| 25% of distribution <     | 125.35    | 79.21  | 34.21  | Plot Size        | 45      |
| 50% of distribution <     | 175.50    | 110.85 | 45.54  | Smoothing        | 3       |
| 75% of distribution <     | 245.71    | 155.18 | 62.26  | Plot Range       | 100     |
| 80% of distribution <     | 267.08    | 168.67 | 67.41  |                  |         |
| 90% of distribution <     | 332.63    | 210.05 | 83.30  |                  |         |
| 99% of distribution <     | 559.93    | 353.55 | 138.71 |                  |         |

#### Printed:

2019/4/18 14:23 UTC+08:00 - zyy

#### Measured:

2019/4/18 14:21 UTC+08:00 - zyy

#### Approved:

2019/4/18 14:21 UTC+08:00 - zzw

**Figure S8.** The particle size and distribution of the cabazitaxel liposome (2)

# Particle Size Analysis

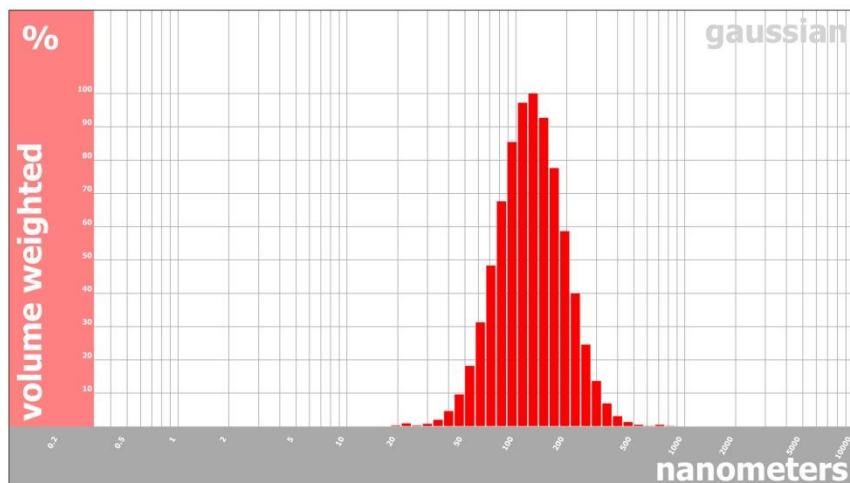

Particle Sizing System NICOMP

Serial Number

1808303

**cabazitaxel liposome - Lot: 2018111401**

Custom Recipe

Sample Date 2019/4/18

Refractive Index 1.333

Viscosity 0.933 cP

Particle Type Solid

Cell Type Square

Measurement Date 2019/4/18 14:30 UTC+08:00

Channel Width 22  $\mu$ sec (auto)

Temperature 23  $^{\circ}$ C

Intensity Set Point 300 KHz

First Channel Used 2

## Analysis Results - Gaussian Distribution

|                           | Intensity        | Volume        | Number        |                         |         |
|---------------------------|------------------|---------------|---------------|-------------------------|---------|
| <b>Mean Diameter</b>      | <b>194.65</b>    | <b>135.21</b> | <b>61.01</b>  | <b>Run Time</b>         | 0:05:03 |
| St.Dev.                   | 87.40            | 60.71         | 27.39         | <b>Chi<sup>2</sup></b>  | 12.689  |
| CV %                      | 44.90%           | 44.90%        | 44.90%        | <b>Baseline Adj.</b>    | 0.000   |
| PI                        | 0.20             | 0.20          | 0.20          | <b>Decay</b>            | 2.339   |
|                           |                  |               |               | <b>Fit Error</b>        | 4.279   |
|                           |                  |               |               | <b>Residual</b>         | 18.612  |
| <b>Cumulative Results</b> | <b>Intensity</b> | <b>Volume</b> | <b>Number</b> | <b>Minimum Diameter</b> | 10 nm   |
| 25% of distribution <     | 129.93           | 90.26         | 41.70         | <b>Plot Size</b>        | 45      |
| 50% of distribution <     | 175.88           | 122.18        | 55.84         | <b>Smoothering</b>      | 3       |
| 75% of distribution <     | 238.08           | 165.38        | 75.23         | <b>Plot Range</b>       | 100     |
| 80% of distribution <     | 256.63           | 178.27        | 81.04         |                         |         |
| 90% of distribution <     | 312.66           | 217.18        | 98.58         |                         |         |
| 99% of distribution <     | 499.55           | 347.00        | 157.19        |                         |         |

**Printed:**

2019/4/18 14:31 UTC+08:00 - zyy

**Measured:**

2019/4/18 14:30 UTC+08:00 - zyy

**Approved:**

2019/4/18 14:30 UTC+08:00 - zzw

**Figure S9.** The particle size and distribution of the cabazitaxel liposome (3)

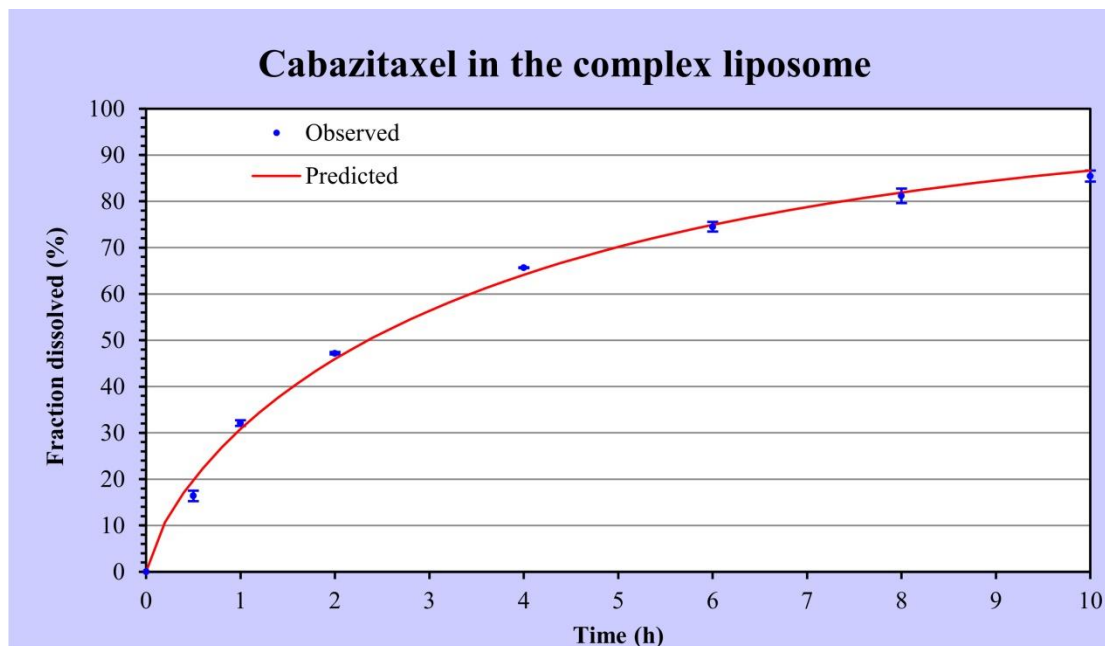

**Figure S10.** The release rate and fitting curve of cabazitaxel in the complex liposome

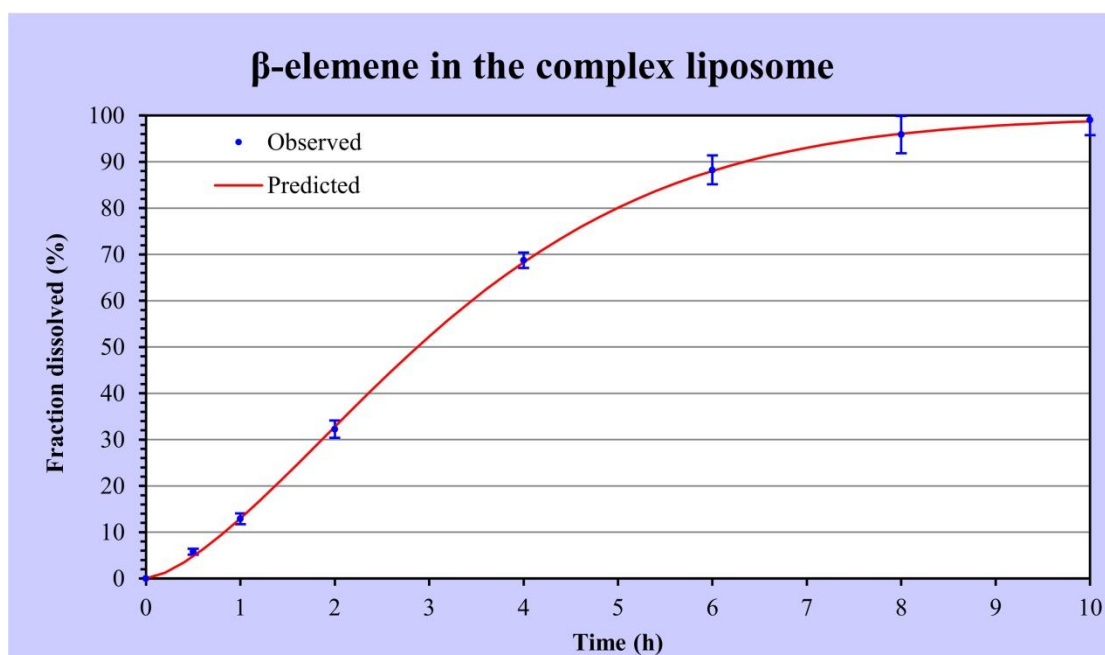

**Figure S11.** The release rate and fitting curve of  $\beta$ -elemene in the complex liposome

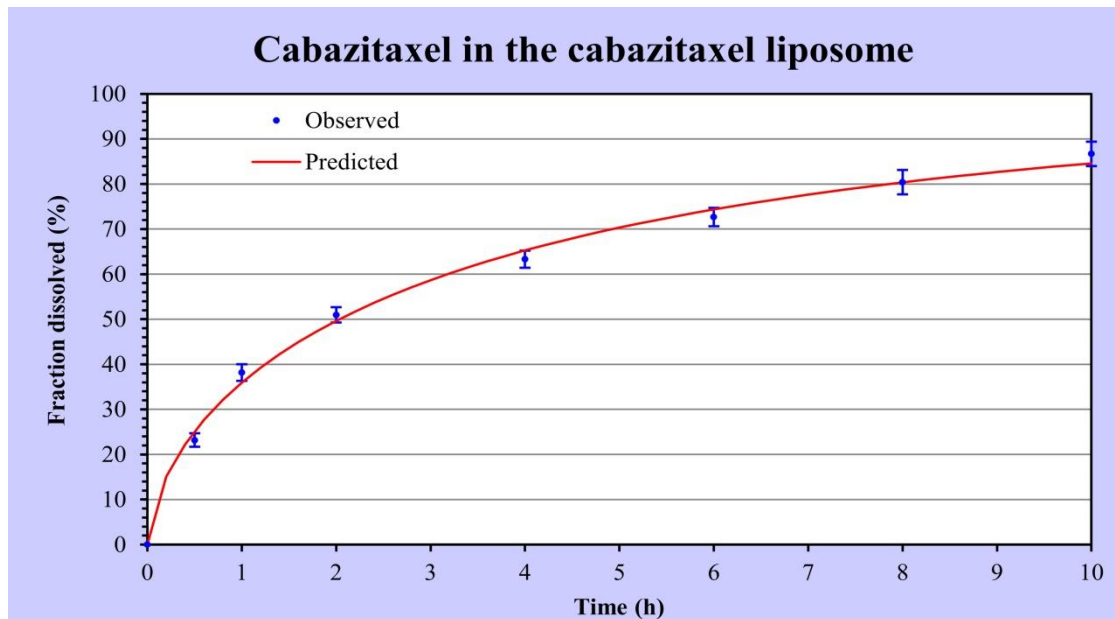

**Figure S12.** The release rate and fitting curve of cabazitaxel in the cabazitaxel liposome

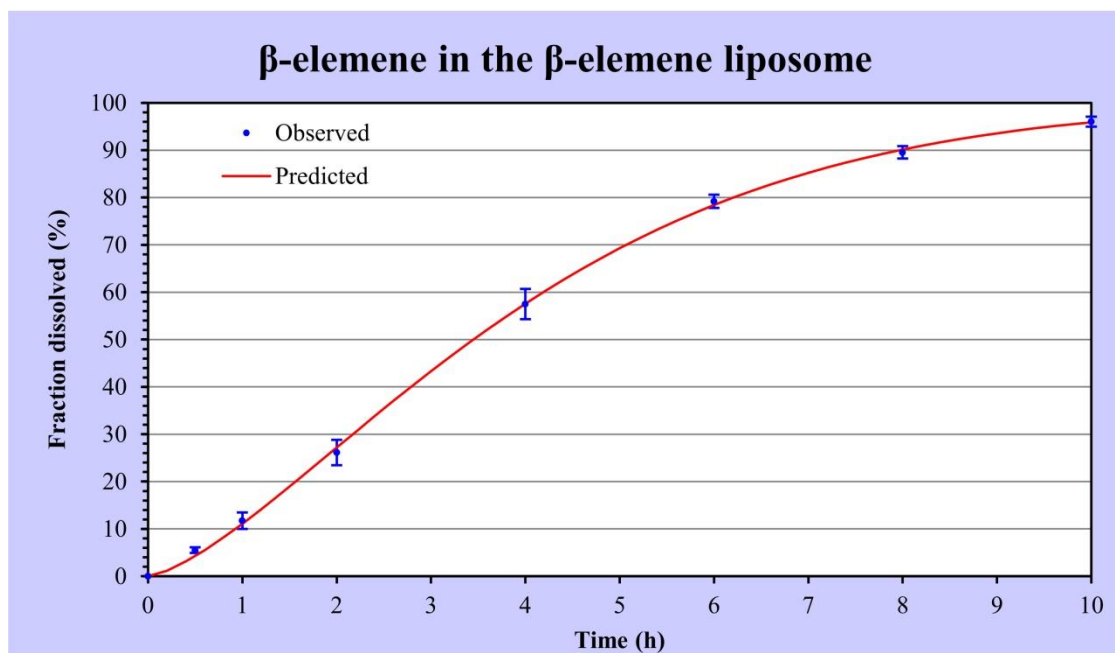

**Figure S13.** The release rate and fitting curve of  $\beta$ -elemene in the  $\beta$ -elemene liposome
